# Supplementary material
Source: PubMed Central journal article supplement (PMC2567178)
Supplement: 0806840105_0806840105SI.pdf [file 0806840105_0806840105SI.pdf]

# Supporting Information

Schroeder, *et al.* 10.1073/pnas.0806840105

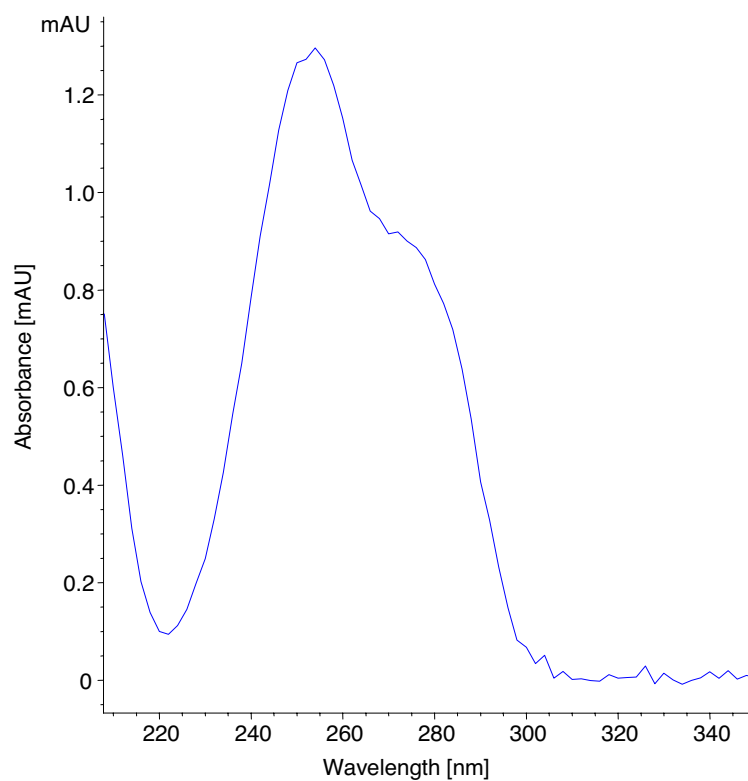

Fig. S1. UV spectrum of compound 3.

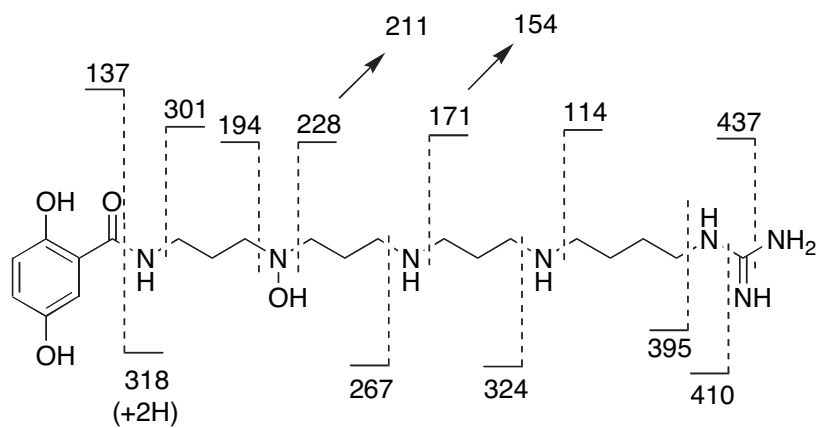

Fig. S2. Electrospray-MS fragmentation pattern of compound 5  $[(M + 1)/z = 454.3 \text{ AMU}]$  (see ref. 1 for a discussion of the fragmentation pattern).

1. Chesnov S, Bigler L, Hesse M (2000) The spider *Paracoelotes birulai*: Detection and structure elucidation of new acylpolyamines by on-line coupled HPLC-APCI-MS and HPLC-APCI-MS/MS. *Helv Chim Acta* 83:3295–3305.

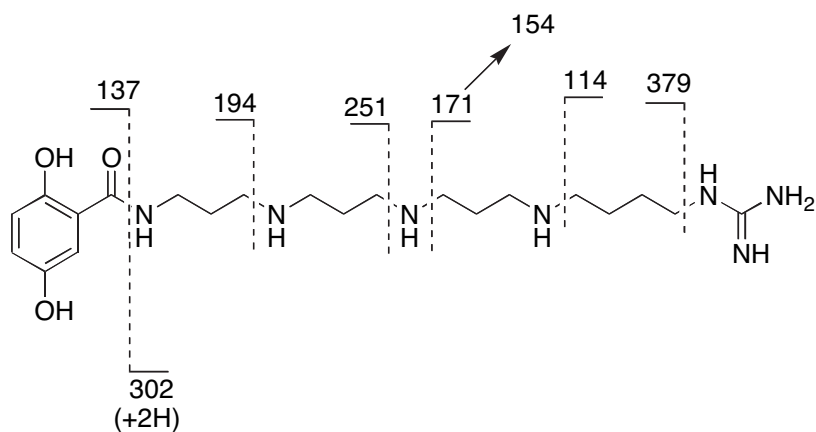

Fig. S3. Electrospray-MS fragmentation pattern of compound 6  $[(M + 1)/z = 438.3 \text{ AMU}]$  (see ref. 1 for a discussion of the fragmentation pattern).

1. Chesnov S, Bigler L, Hesse M (2000) The spider *Paracoelotes birulai*: Detection and structure elucidation of new acylpolyamines by on-line coupled HPLC-APCI-MS and HPLC-APCI-MS/MS. *Helv Chim Acta* 83:3295–3305.

Table S1. NMR spectroscopic and MS data of compound 3

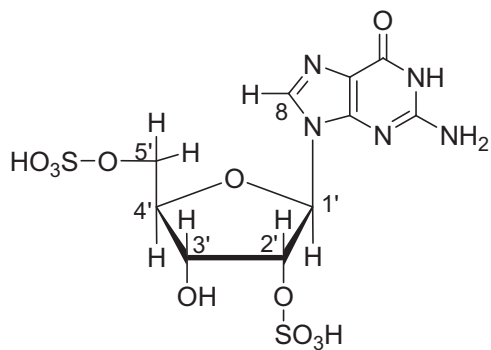

| Position | $\delta^{13}\text{C}$ , ppm | $\delta^1\text{H}$ , ppm     | Relevant HMBC correlations |
|----------|-----------------------------|------------------------------|----------------------------|
| 2        | 156.1*                      |                              |                            |
| 4        | 154.1                       |                              |                            |
| 5        | 118.6                       |                              |                            |
| 6        | 161.5*                      |                              |                            |
| 8        | 140.3                       | 8.02 (s)                     | C-4, C-5                   |
| 1'       | 88.1                        | 6.17 ( $J_{1'-2'} = 5.7$ )   | C-8, C-4                   |
| 2'       | 80.2                        | 5.41 ( $J_{2'-3'} = 5.5$ )   |                            |
| 3'       | 71.6                        | 4.76 ( $J_{3'-4'} = 3.4$ )   |                            |
| 4'       | 84.5                        | 4.43 ( $J_{4'-5'ab} = 3.2$ ) |                            |
| 5'ab     | 69.4                        | 4.37                         |                            |

ESI-MS (negative ion): (M-1)/z = 442.00 AMU

\*These  $^{13}\text{C}$  chemical shift values were determined from HMBC spectra of a synthetic sample acquired by using a delay of 120 ms.

Table S2. Partial NMR spectroscopic data of compound 5

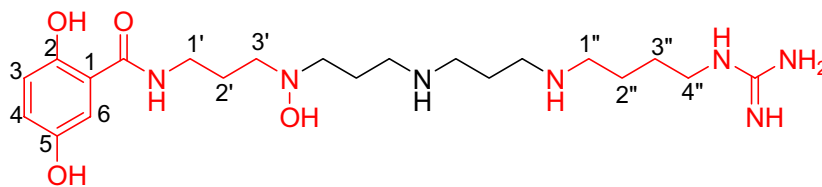

| Position | $\delta^{13}\text{C}$ , ppm | $\delta^1\text{H}$ , ppm | Relevant HMBC correlations |
|----------|-----------------------------|--------------------------|----------------------------|
| 1        | 117.1                       |                          |                            |
| 2        | 147.9                       |                          |                            |
| 3        | 117.8                       | 6.902                    | C = O                      |
| 4        | 120.8                       | 6.99                     |                            |
| 5        | 150.0                       |                          |                            |
| 6        | 113.7                       | 7.18                     | C = O                      |
| C        | 168.6                       |                          |                            |
| =        |                             |                          |                            |
| O        |                             |                          |                            |
| 1'       | 37.0                        | 3.46                     | C = O                      |
| 2'       | 25.4                        | 1.91                     |                            |
| 3'       | 57.2                        | 2.83                     |                            |
| 1''      |                             | 3.08                     |                            |
| 2''      |                             | 1.75                     |                            |
| 3''      |                             | 1.66                     |                            |
| 4''      |                             | 3.23                     | C = N                      |
| C        | 156.1                       |                          |                            |
| =        |                             |                          |                            |
| N        |                             |                          |                            |

Table S3. Partial NMR spectroscopic data of compound 6

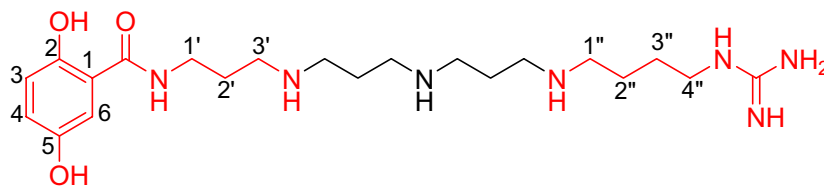

| Position | $\delta^{13}\text{C}$ , ppm | $\delta^1\text{H}$ , ppm | Relevant HMBC correlations |
|----------|-----------------------------|--------------------------|----------------------------|
| 1        |                             |                          |                            |
| 2        | 147.9                       |                          |                            |
| 3        | 117.8                       | 6.905                    | C = O                      |
| 4        | 120.8                       | 7.00                     |                            |
| 5        |                             |                          |                            |
| 6        | 113.7                       | 7.20                     | C = O                      |
| C        | 169.0                       |                          |                            |
| =        |                             |                          |                            |
| O        |                             |                          |                            |
| 1'       | 35.8                        | 3.51                     | C = O                      |
| 2'       | 25.1                        | 2.03                     |                            |
| 3'       | 44.8                        | 3.14                     |                            |
| 1''      |                             | 3.05                     |                            |
| 2''      |                             | 1.73                     |                            |
| 3''      |                             | 1.63                     |                            |
| 4''      |                             | 3.20                     | C = N                      |
| C        | 156.1                       |                          |                            |
| =        |                             |                          |                            |
| N        |                             |                          |                            |

Table S4. NMR spectroscopic and MS data of compound 4

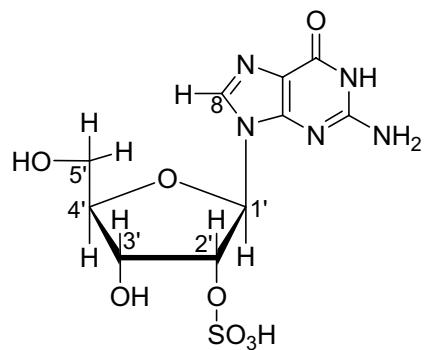

| Position                                    | $\delta$ $^1\text{H}$ , ppm                        |
|---------------------------------------------|----------------------------------------------------|
| 8                                           | 8.00 (s)                                           |
| 1'                                          | 6.14 ( $J_{1'-2'} = 5.5$ )                         |
| 2'                                          | 5.40 ( $J_{2'-3'} = 5.5$ )                         |
| 3'                                          | 4.66 ( $J_{3'-4'} = 3.4$ )                         |
| 4'                                          | 4.28 ( $J_{4'-5'a} = 3.7$ ) ( $J_{4'-5'a} = 3.2$ ) |
| 5'a 5'b                                     | 3.87 ( $J_{5'a-5'b} = 12.0$ ) 3.93                 |
| ESI-MS (negative ion): (M-1)/z = 362.05 AMU |                                                    |

**Table S5. NMR-spectroscopic data of 2',3',5'-trisulfated guanosine**

| Position | $\delta^{13}\text{C}$ , ppm | $\delta^1\text{H}$ , ppm     |
|----------|-----------------------------|------------------------------|
| 2        | 156.1                       |                              |
| 4        | 154.2                       |                              |
| 5        | 118.1                       |                              |
| 6        | 161.4                       |                              |
| 8        | 140.5                       | 8.01 (s)                     |
| 1'       | 87.9                        | 6.17 ( $J_{1'-2'} = 5.7$ )   |
| 2'       | 78.0                        | 5.58 ( $J_{2'-3'} = 5.6$ )   |
| 3'       | 77.2                        | 5.30 ( $J_{3'-4'} = 3.3$ )   |
| 4'       | 83.2                        | 4.72 ( $J_{4'-5'ab} = 3.2$ ) |
| 5'ab     | 69.4                        | 4.38                         |



**Table S6. NMR-spectroscopic data of 3',5'-disulfated guanosine**

| Position | $\delta^{13}\text{C}$ , ppm | $\delta^1\text{H}$ , ppm     |
|----------|-----------------------------|------------------------------|
| 2        | 156.1                       |                              |
| 4        | 154.2                       |                              |
| 5        | 118.1                       |                              |
| 6        | 161.4                       |                              |
| 8        | 139.8                       | 8.04 (s)                     |
| 1'       | 88.8                        | 5.96 ( $J_{1'-2'} = 5.8$ )   |
| 2'       | 74.3                        | 4.97 ( $J_{2'-3'} = 5.6$ )   |
| 3'       | 78.9                        | 5.07 ( $J_{3'-4'} = 3.4$ )   |
| 4'       | 83.5                        | 4.70 ( $J_{4'-5'ab} = 3.3$ ) |
| 5'ab     | 69.6                        | 4.34                         |

**Table S7. NMR-spectroscopic data of 5'-sulfated guanosine**

| Position | $\delta^{13}\text{C}$ , ppm | $\delta^1\text{H}$ ppm                 |
|----------|-----------------------------|----------------------------------------|
| 2        | 156.1                       |                                        |
| 4        | 154.0                       |                                        |
| 5        | 118.1                       |                                        |
| 6        | 161.4                       |                                        |
| 8        | 139.6                       | 8.03 (s)                               |
| 1'       | 89.3                        | 5.94 ( $J_{1'-2'} = 5.7$ )             |
| 2'       | 75.7                        | 4.75 ( $J_{2'-3'} = 5.5$ )             |
| 3'       | 72.6                        | 4.49 ( $J_{3'-4'} = 3.4$ )             |
| 4'       | 84.9                        | 4.40 ( $J_{4'-5'_{\text{ab}}} = 3.2$ ) |
| 5'ab     | 69.6                        | 4.29–4.38                              |
